# Supplementary material for: Establishing a three-miRNA signature as a prognostic model for colorectal cancer through bioinformatics analysis
Source: Aging (Albany NY). 2021 Aug 13;13(15):19894–907. doi: 10.18632/aging.203400 (PMC8386531; doi:10.18632/aging.203400)
Supplement: Supplementary Table 1 [file aging-13-203400-s002.xls]

Supplementary Table 1. The expression information of 496 DMIRs.
id	logFC	logCPM	PValue	FDR
hsa-miR-19a-3p	10.70441734	5.981116989	4.98E-22	4.01E-21
hsa-miR-592	10.02547622	5.311036934	2.88E-11	1.01E-10
hsa-miR-135b-5p	9.311597651	6.603342399	2.28E-19	1.44E-18
hsa-miR-628-5p	9.075791871	4.374860886	3.36E-12	1.27E-11
hsa-miR-335-5p	9.01904317	4.325783197	9.47E-24	8.51E-23
hsa-miR-514a-3p	8.86179279	4.153772432	0.000161939	0.000313589
hsa-miR-7-5p	8.57573004	3.896782214	1.05E-13	4.58E-13
hsa-miR-3613-5p	8.450491904	3.778763581	5.84E-18	3.41E-17
hsa-miR-452-3p	8.056063547	3.402808077	3.82E-14	1.75E-13
hsa-miR-374a-3p	7.993705198	9.998500679	1.26E-32	1.88E-31
hsa-miR-450b-5p	7.98578385	3.331571769	2.65E-16	1.41E-15
hsa-miR-653-5p	7.859074123	3.2065672	4.95E-08	1.33E-07
hsa-miR-369-3p	7.70455006	3.071190448	3.20E-16	1.69E-15
hsa-miR-32-5p	7.571593171	4.92335838	8.06E-30	9.91E-29
hsa-miR-577	7.566245126	6.796704496	7.52E-12	2.73E-11
hsa-miR-454-3p	7.499360976	2.873664325	5.00E-18	2.95E-17
hsa-miR-450a-5p	7.368105264	2.75057356	4.18E-13	1.71E-12
hsa-miR-590-3p	7.368095831	2.765508086	5.96E-15	2.88E-14
hsa-miR-376c-3p	7.172328964	2.571930205	2.28E-11	8.17E-11
hsa-miR-142-5p	7.162393613	6.543569029	4.62E-27	5.06E-26
hsa-miR-19b-3p	7.001905106	7.897908304	1.75E-32	2.55E-31
hsa-miR-190a-5p	6.989164889	2.416621328	7.18E-12	2.62E-11
hsa-miR-590-5p	6.96618631	4.337990017	1.17E-19	7.55E-19
hsa-miR-26a-2-3p	6.918354441	2.36401444	1.64E-12	6.45E-12
hsa-miR-142-3p	6.864109954	11.36587529	2.75E-23	2.32E-22
hsa-miR-18a-5p	6.765964892	4.957017891	3.30E-20	2.31E-19
hsa-miR-153-3p	6.615322872	2.092754241	2.98E-07	7.50E-07
hsa-miR-21-5p	6.528869529	17.68805208	1.95E-60	6.50E-59
hsa-miR-424-5p	6.472306467	7.176485432	5.75E-27	6.20E-26
hsa-miR-5683	6.372528757	1.908972276	0.001407841	0.002442813
hsa-miR-708-5p	6.248799287	4.427375247	4.29E-17	2.42E-16
hsa-miR-181b-2-3p	6.185498258	1.715106773	1.02E-05	2.32E-05
hsa-miR-374b-3p	6.18195248	1.71397161	2.58E-09	7.79E-09
hsa-miR-542-3p	6.18004295	7.337886939	4.08E-29	4.84E-28
hsa-miR-20a-3p	6.129475082	4.823046659	1.51E-12	5.99E-12
hsa-miR-4668-3p	6.064850598	1.637871969	8.10E-07	1.99E-06
hsa-miR-362-3p	6.049401405	1.604171734	9.54E-08	2.50E-07
hsa-miR-374a-5p	6.010115532	5.104425041	9.49E-25	8.64E-24
hsa-miR-126-5p	5.991306585	7.359292581	1.69E-34	2.76E-33
hsa-miR-29b-3p	5.961938164	9.718853443	1.64E-35	2.87E-34
hsa-miR-203b-3p	5.959371457	7.672619336	3.40E-16	1.78E-15
hsa-miR-889-3p	5.850809101	4.071320807	2.35E-20	1.68E-19
hsa-miR-181b-3p	5.840709582	4.021842318	9.96E-15	4.75E-14
hsa-miR-153-5p	5.836558771	5.441820298	3.70E-12	1.39E-11
hsa-miR-146a-3p	5.768266634	1.345041716	0.00576799	0.009295083
hsa-miR-33a-5p	5.746226369	5.824313906	7.85E-14	3.50E-13
hsa-miR-301a-3p	5.725197596	3.142843346	3.23E-13	1.33E-12
hsa-miR-382-3p	5.7198468	1.336409015	5.93E-07	1.46E-06
hsa-miR-144-3p	5.658162863	3.041473263	1.33E-08	3.77E-08
hsa-miR-222-5p	5.634450347	3.789163903	1.00E-13	4.42E-13
hsa-miR-135b-3p	5.627992254	1.284279215	3.02E-05	6.35E-05
hsa-miR-31-3p	5.582929692	2.916855372	6.59E-05	0.00013395
hsa-miR-552-5p	5.573462154	7.148882207	1.69E-11	6.12E-11
hsa-miR-144-5p	5.553330701	6.126439977	1.71E-14	8.05E-14
hsa-miR-4444	5.496781339	1.207306486	7.46E-06	1.71E-05
hsa-miR-582-3p	5.488994903	8.628907291	2.79E-25	2.60E-24
hsa-miR-374c-5p	5.469899919	1.094206119	0.02457407	0.034044314
hsa-miR-203a-5p	5.443311034	1.14753864	3.12E-05	6.56E-05
hsa-miR-154-3p	5.433629646	1.136142499	1.11E-05	2.48E-05
hsa-miR-429	5.433597972	8.652543825	3.29E-29	3.97E-28
hsa-miR-26a-1-3p	5.388971957	2.884975465	2.62E-05	5.62E-05
hsa-miR-101-3p	5.356488849	12.68439053	4.37E-44	1.13E-42
hsa-miR-141-3p	5.335495551	10.12743452	3.75E-27	4.17E-26
hsa-miR-1277-3p	5.334868113	1.0665675	2.17E-05	4.71E-05
hsa-miR-301b-3p	5.334580675	1.061995912	4.72E-05	9.71E-05
hsa-miR-5586-5p	5.311139716	1.041308999	1.03E-05	2.33E-05
hsa-miR-708-3p	5.289385367	5.30852485	6.57E-20	4.34E-19
hsa-miR-33b-5p	5.284291307	2.753082379	9.77E-08	2.56E-07
hsa-miR-136-5p	5.268700551	4.736980154	1.93E-14	9.04E-14
hsa-miR-377-3p	5.255976482	1.012003553	2.55E-05	5.51E-05
hsa-let-7a-3p	5.241395974	4.856134184	1.67E-27	1.95E-26
hsa-miR-376a-5p	5.18794829	0.955388291	1.84E-05	4.05E-05
hsa-miR-4791	5.186500142	0.964311311	9.97E-05	0.000198017
hsa-miR-4772-5p	5.166514423	0.94619075	0.000150276	0.00029181
hsa-miR-1-3p	5.162055676	5.798207163	1.79E-07	4.55E-07
hsa-miR-98-3p	5.106566833	0.916123204	1.33E-05	2.93E-05
hsa-miR-20a-5p	5.09899291	9.093659085	1.13E-20	8.22E-20
hsa-miR-219a-5p	5.065781473	0.875573892	0.000288644	0.000532472
hsa-miR-548f-3p	5.063418982	0.883078203	0.001669211	0.002867934
hsa-miR-106b-5p	5.061610431	8.204781622	4.28E-51	1.31E-49
hsa-miR-141-5p	5.03278664	9.563138134	2.27E-30	2.90E-29
hsa-miR-508-3p	5.009018191	5.693837491	0.001604691	0.002763853
hsa-miR-491-3p	4.996951951	0.827381289	0.000124164	0.000243126
hsa-miR-376b-3p	4.989687569	0.805871403	0.000329342	0.000605955
hsa-miR-411-3p	4.984497326	0.802804008	0.000223044	0.000421438
hsa-miR-96-5p	4.981065134	4.407390215	2.03E-16	1.08E-15
hsa-miR-32-3p	4.960902998	0.798142489	3.64E-05	7.60E-05
hsa-miR-499a-5p	4.956684063	0.813351832	0.009875337	0.015181165
hsa-miR-182-5p	4.919154009	14.08549593	3.99E-20	2.77E-19
hsa-miR-7705	4.912287694	0.763931588	0.00042778	0.000776875
hsa-miR-16-1-3p	4.851555381	2.349817093	6.69E-12	2.47E-11
hsa-miR-215-5p	4.802718922	9.976220892	8.25E-09	2.41E-08
hsa-miR-3662	4.784814838	0.688263843	0.001044715	0.001835452
hsa-miR-3682-3p	4.784705227	0.675503339	0.000284357	0.000527339
hsa-miR-340-5p	4.746718168	3.832759621	1.74E-10	5.62E-10
hsa-miR-452-5p	4.723242355	6.83604953	1.62E-18	9.72E-18
hsa-miR-335-3p	4.712763869	7.705225763	2.59E-23	2.21E-22
hsa-miR-2355-5p	4.711592671	5.034134791	2.74E-26	2.80E-25
hsa-miR-570-3p	4.626298169	0.581312965	0.000669333	0.001196945
hsa-miR-155-3p	4.616884444	0.563914146	0.002742	0.004631667
hsa-miR-1307-5p	4.574143207	9.081505854	6.97E-10	2.18E-09
hsa-miR-101-5p	4.491010785	2.780631839	8.32E-11	2.79E-10
hsa-miR-652-5p	4.49067499	0.507752657	0.000548746	0.00099142
hsa-miR-19b-1-5p	4.472952666	3.888247414	5.79E-15	2.82E-14
hsa-miR-203a-3p	4.456958927	14.39977213	4.19E-16	2.17E-15
hsa-miR-98-5p	4.415190707	5.714301518	2.16E-26	2.26E-25
hsa-miR-379-5p	4.410975664	9.707655986	5.16E-21	3.81E-20
hsa-miR-29a-5p	4.369618013	3.805366231	1.93E-12	7.57E-12
hsa-miR-380-5p	4.357145249	0.416865921	0.005678659	0.009172212
hsa-miR-556-5p	4.355211028	0.426685325	0.003560241	0.005914049
hsa-miR-411-5p	4.34541185	3.058949135	4.40E-10	1.40E-09
hsa-miR-552-3p	4.342384618	6.049965058	7.80E-08	2.06E-07
hsa-miR-30e-5p	4.330395013	12.35804165	1.86E-27	2.14E-26
hsa-miR-136-3p	4.324169143	3.09513507	3.16E-12	1.20E-11
hsa-miR-206	4.316786699	0.402093281	0.02533497	0.034960264
hsa-miR-188-5p	4.314827807	2.62198934	1.80E-08	5.06E-08
hsa-miR-376a-3p	4.305836218	0.383582198	0.004683742	0.007635588
hsa-miR-3614-3p	4.254082775	0.372079643	0.002821658	0.004754765
hsa-miR-18b-5p	4.243669158	0.363747969	0.004844144	0.007878759
hsa-let-7f-2-3p	4.230599922	0.343570642	0.001385869	0.002416652
hsa-miR-656-3p	4.216731083	0.337063568	0.003291455	0.005493595
hsa-miR-16-5p	4.189688712	9.409202305	7.63E-26	7.33E-25
hsa-miR-556-3p	4.173576898	0.330480963	0.004190129	0.006878876
hsa-miR-345-3p	4.152551952	0.325357952	0.003748902	0.006183483
hsa-miR-16-2-3p	4.13528169	3.252461522	1.28E-14	6.06E-14
hsa-miR-7-1-3p	4.135162915	5.052849811	5.51E-20	3.71E-19
hsa-miR-24-2-5p	4.133589749	4.799741448	7.62E-26	7.33E-25
hsa-miR-374b-5p	4.123762619	6.205852215	7.32E-25	6.75E-24
hsa-miR-660-5p	4.12372843	5.709603363	5.15E-17	2.87E-16
hsa-miR-3117-3p	4.116842697	0.281010072	0.004490498	0.007337621
hsa-miR-4677-3p	4.103549303	2.891271701	7.98E-14	3.54E-13
hsa-miR-495-3p	4.062222552	2.836714259	2.63E-12	1.00E-11
hsa-miR-580-3p	4.053051079	0.253175758	0.010672193	0.01630023
hsa-miR-199b-5p	4.051026317	6.722529588	7.72E-18	4.47E-17
hsa-miR-455-5p	3.98728683	4.081391138	1.17E-13	5.04E-13
hsa-miR-3189-3p	3.972734561	0.221531642	0.005221284	0.008452934
hsa-miR-301a-5p	3.966572589	2.739194669	2.02E-05	4.41E-05
hsa-miR-539-3p	3.934113086	0.182553725	0.013642096	0.020260825
hsa-let-7f-5p	3.930072683	13.08291357	3.02E-09	9.09E-09
hsa-miR-34a-3p	3.924712813	0.191384366	0.007866622	0.012364354
hsa-miR-15b-3p	3.912616864	5.200601713	1.34E-21	1.04E-20
hsa-miR-127-5p	3.908258677	7.888559097	7.75E-20	5.08E-19
hsa-miR-561-5p	3.896119818	0.18194734	0.012199507	0.018312323
hsa-miR-299-3p	3.88471947	0.160527942	0.007067349	0.011208624
hsa-miR-217-5p	3.880048671	5.396176149	1.18E-07	3.06E-07
hsa-miR-582-5p	3.826096816	3.687240647	1.01E-13	4.42E-13
hsa-miR-218-5p	3.812187208	4.290014201	3.54E-09	1.06E-08
hsa-miR-106a-5p	3.790544685	5.48077796	2.06E-06	4.82E-06
hsa-miR-421	3.789534705	2.101217638	8.26E-07	2.00E-06
hsa-miR-376a-2-5p	3.774476803	0.115304873	0.006808858	0.010847748
hsa-miR-126-3p	3.767250521	10.96698728	5.18E-30	6.48E-29
hsa-miR-200a-3p	3.766211389	9.314147435	9.11E-19	5.55E-18
hsa-miR-4766-3p	3.7613076	0.129889514	0.007478739	0.011834303
hsa-miR-17-5p	3.761007946	10.02258286	8.49E-18	4.88E-17
hsa-miR-545-5p	3.742090892	0.118538837	0.011059863	0.016781307
hsa-miR-3912-3p	3.738403894	0.084493155	0.024236099	0.033776353
hsa-miR-548e-3p	3.73622154	0.104001459	0.015351258	0.022466038
hsa-miR-152-3p	3.735033944	7.698487564	2.90E-22	2.37E-21
hsa-miR-655-3p	3.719936375	1.379745261	2.79E-05	5.92E-05
hsa-miR-651-5p	3.696443026	2.030967843	2.59E-07	6.53E-07
hsa-miR-148a-3p	3.691128651	16.05661783	2.46E-20	1.74E-19
hsa-miR-549a-3p	3.676087612	0.073146163	0.022073177	0.031259186
hsa-miR-5706	3.673848391	0.073596705	0.024995057	0.03455924
hsa-miR-3942-5p	3.652904531	0.059742967	0.009389465	0.014529835
hsa-miR-4709-3p	3.624613664	0.042641437	0.012344221	0.01845053
hsa-miR-10a-3p	3.616658578	3.343665768	4.57E-08	1.24E-07
hsa-miR-548d-3p	3.613648049	0.052164989	0.010880619	0.016581117
hsa-miR-5000-3p	3.604176146	1.318599083	1.06E-05	2.38E-05
hsa-miR-4662a-5p	3.588741099	3.656165344	1.19E-05	2.65E-05
hsa-miR-496	3.579112965	1.312648376	3.46E-05	7.23E-05
hsa-miR-503-5p	3.578811814	3.248511953	1.66E-06	3.92E-06
hsa-miR-511-3p	3.543791103	0.011904075	0.014092045	0.020840767
hsa-miR-5699-5p	3.54037618	0.002638724	0.016928347	0.024467569
hsa-miR-548au-3p	3.537751131	0.035265603	0.016883052	0.024452519
hsa-miR-6733-3p	3.516176116	0.007560798	0.012421477	0.018487167
hsa-miR-497-3p	3.512568602	0.012595802	0.027598647	0.03793461
hsa-miR-15a-5p	3.500939128	7.026264118	2.06E-23	1.81E-22
hsa-miR-140-5p	3.492537072	5.25593234	7.97E-26	7.55E-25
hsa-let-7f-1-3p	3.488899533	1.872470927	1.49E-08	4.20E-08
hsa-miR-494-3p	3.463530991	1.18674215	6.62E-05	0.00013411
hsa-miR-30b-5p	3.419772308	8.438177106	6.35E-17	3.50E-16
hsa-miR-186-3p	3.40457946	-0.032352822	0.027781776	0.038111595
hsa-miR-195-5p	3.399225827	4.90783597	7.55E-10	2.34E-09
hsa-miR-3684	3.39400839	-0.036306054	0.01700776	0.02453177
hsa-miR-143-3p	3.374917592	17.43707434	5.25E-07	1.30E-06
hsa-miR-5684	3.358937277	-0.054738113	0.020238767	0.028953828
hsa-miR-3065-5p	3.352327782	1.136794857	0.00246699	0.004177198
hsa-miR-193a-3p	3.328402684	3.008012106	7.14E-09	2.10E-08
hsa-miR-598-3p	3.311472768	3.923918295	4.66E-08	1.26E-07
hsa-miR-643	3.293339714	-0.094159454	0.030079018	0.040784123
hsa-miR-26b-5p	3.272555682	9.26482406	2.14E-23	1.85E-22
hsa-miR-10a-5p	3.238190223	16.31599843	5.04E-10	1.60E-09
hsa-miR-30d-3p	3.144350906	2.323562456	4.97E-08	1.33E-07
hsa-miR-29c-3p	3.097789404	10.08262775	1.83E-09	5.58E-09
hsa-miR-199b-3p	3.089718431	11.42257237	5.86E-12	2.17E-11
hsa-miR-34c-5p	3.088797446	1.579499792	0.001025337	0.001805933
hsa-miR-199a-3p	3.085884296	11.42477052	5.81E-12	2.17E-11
hsa-miR-627-5p	3.069299257	1.515154111	3.70E-05	7.70E-05
hsa-miR-301b-5p	3.059064752	0.945669217	0.007663458	0.012099288
hsa-miR-192-5p	3.002160807	16.17907812	1.19E-10	3.93E-10
hsa-miR-196a-5p	3.000607923	8.158925452	2.20E-08	6.12E-08
hsa-miR-183-3p	2.998749659	0.883326605	0.001511269	0.002615801
hsa-miR-337-3p	2.956959822	4.684841394	2.07E-13	8.68E-13
hsa-miR-22-5p	2.942153229	4.593117895	2.49E-12	9.54E-12
hsa-miR-338-3p	2.920641167	9.029893088	1.42E-06	3.38E-06
hsa-miR-185-5p	2.912849225	5.761389283	3.72E-19	2.31E-18
hsa-miR-183-5p	2.882739905	13.11783266	2.65E-10	8.48E-10
hsa-miR-33a-3p	2.870012737	1.398245681	5.89E-05	0.000120468
hsa-miR-451a	2.859695748	8.245199022	8.25E-07	2.00E-06
hsa-miR-3677-5p	2.854489787	1.381744514	0.000266871	0.00049949
hsa-miR-671-5p	2.849179454	2.092087617	1.61E-06	3.79E-06
hsa-miR-21-3p	2.818572039	11.72133586	5.60E-20	3.74E-19
hsa-miR-223-3p	2.797353911	8.588608441	1.43E-06	3.38E-06
hsa-let-7c-3p	2.792451226	2.634531597	0.000690909	0.001232385
hsa-miR-95-3p	2.708455266	4.047039355	2.30E-07	5.82E-07
hsa-miR-2355-3p	2.675848749	2.20495196	1.30E-05	2.89E-05
hsa-miR-9-3p	2.636237202	0.599932004	0.024203491	0.033776353
hsa-miR-3677-3p	2.576553059	3.110040485	4.23E-06	9.71E-06
hsa-miR-147b-3p	2.477691967	2.048267035	0.001077807	0.001888857
hsa-miR-196b-5p	2.453492979	11.83009165	8.64E-05	0.000173469
hsa-miR-376c-5p	2.421313894	0.511239872	0.017659452	0.025419457
hsa-miR-27a-5p	2.405980262	4.98477771	2.28E-06	5.32E-06
hsa-miR-24-1-5p	2.391002604	3.860942829	5.65E-09	1.67E-08
hsa-miR-27a-3p	2.39046027	10.65494063	7.42E-14	3.33E-13
hsa-miR-24-3p	2.379052849	10.97401736	4.30E-23	3.59E-22
hsa-miR-376b-5p	2.373769549	0.484279484	0.022213873	0.031395011
hsa-miR-369-5p	2.307479472	2.538976548	0.00027396	0.000509405
hsa-miR-4999-5p	2.265614184	0.426495886	0.037398266	0.049935589
hsa-miR-17-3p	2.254964721	8.720479834	4.21E-08	1.15E-07
hsa-miR-3613-3p	2.249957332	0.380837102	0.015914396	0.02319333
hsa-miR-10b-5p	2.243821474	15.31995572	8.53E-08	2.25E-07
hsa-miR-216a-5p	2.234023314	0.874870746	0.022984213	0.032288443
hsa-miR-146b-5p	2.2297728	8.982257088	1.02E-08	2.96E-08
hsa-miR-7974	2.196548432	0.882226184	0.033539594	0.04512717
hsa-miR-148b-5p	2.185816927	1.797981296	1.93E-05	4.24E-05
hsa-miR-224-5p	2.171823485	6.430689252	3.48E-06	8.11E-06
hsa-miR-181d-5p	2.148335819	4.43696721	0.000266188	0.00049949
hsa-miR-454-5p	2.108669231	0.307681735	0.028620941	0.039186094
hsa-miR-130b-3p	2.061201992	4.568582474	4.58E-11	1.59E-10
hsa-miR-584-5p	2.056849158	8.415736985	2.72E-05	5.81E-05
hsa-miR-34a-5p	2.039100883	6.897147709	1.80E-09	5.52E-09
hsa-miR-10b-3p	2.007416335	3.804021008	0.000166004	0.000320575
hsa-miR-151a-3p	1.99073401	11.33346025	4.26E-09	1.27E-08
hsa-miR-194-5p	1.947967407	14.20057813	8.17E-09	2.40E-08
hsa-miR-196b-3p	1.941827842	0.736644403	0.036450571	0.048763073
hsa-miR-188-3p	1.937282012	1.404316308	0.014993119	0.022080203
hsa-miR-27b-5p	1.889163017	4.059610196	2.42E-08	6.68E-08
hsa-miR-146a-5p	1.870609251	7.922532859	3.96E-05	8.21E-05
hsa-miR-26a-5p	1.85536239	10.75665256	1.35E-10	4.44E-10
hsa-miR-22-3p	1.850828323	15.57757762	7.82E-11	2.65E-10
hsa-miR-744-3p	1.850220078	4.467949083	0.000287593	0.000531933
hsa-miR-3913-5p	1.843608547	1.290187245	0.002949399	0.00494624
hsa-miR-223-5p	1.832261189	2.455766676	0.003952287	0.006503646
hsa-miR-6854-5p	1.817009289	0.610778145	0.012381139	0.018466337
hsa-miR-9-5p	1.780866913	8.615677786	0.011138699	0.016864423
hsa-miR-412-5p	1.771427784	2.736940571	0.010430825	0.016000018
hsa-miR-130a-3p	1.718610341	5.22629925	1.32E-06	3.15E-06
hsa-miR-758-5p	1.704505747	3.264672749	0.001397315	0.002430565
hsa-miR-548o-3p	1.643166868	0.51114817	0.029652414	0.04036183
hsa-miR-493-3p	1.615044865	2.695286342	0.000169906	0.00032721
hsa-let-7g-5p	1.602059979	9.23190349	2.37E-11	8.45E-11
hsa-miR-576-5p	1.593145128	3.65252632	9.15E-05	0.000182658
hsa-miR-409-5p	1.584754792	3.55090867	0.000748397	0.001324814
hsa-let-7g-3p	1.543738097	5.257556274	0.000408099	0.000743058
hsa-miR-28-5p	1.488819797	6.828743623	6.47E-10	2.04E-09
hsa-miR-493-5p	1.429290342	3.183339093	0.000335697	0.000616031
hsa-miR-29b-1-5p	1.404603534	3.634293134	0.001909581	0.00325614
hsa-miR-145-3p	1.401270198	5.878874885	0.001233789	0.002156824
hsa-miR-143-5p	1.393819236	7.570175247	0.028935376	0.039539374
hsa-miR-186-5p	1.38170649	8.151072613	1.70E-10	5.51E-10
hsa-miR-431-5p	1.354888601	1.76533189	0.021936907	0.031129093
hsa-miR-3065-3p	1.353630495	3.699265979	0.030786444	0.041662737
hsa-miR-200c-5p	1.340393586	6.197260384	0.000618071	0.001108102
hsa-miR-221-5p	1.309068455	2.98475327	0.032488747	0.04379733
hsa-miR-654-3p	1.262829132	4.714720819	0.002094325	0.003554774
hsa-miR-148a-5p	1.253289749	6.241255227	0.000213036	0.00040581
hsa-miR-200b-3p	1.240444796	11.07143421	6.07E-05	0.000123674
hsa-miR-155-5p	1.195695562	8.510081701	0.005954622	0.009530115
hsa-miR-30a-5p	1.174150893	12.11028386	0.000143976	0.000280352
hsa-miR-23a-3p	1.174112207	11.77031285	4.59E-09	1.36E-08
hsa-miR-25-3p	1.130714434	13.05182323	2.86E-05	6.05E-05
hsa-miR-340-3p	1.130548034	2.636713057	0.00676685	0.01080538
hsa-miR-224-3p	1.102664159	1.504219117	0.023728565	0.033201046
hsa-miR-107	1.101286767	5.994189652	0.000199924	0.00038187
hsa-miR-758-3p	1.024902156	3.106595244	0.029115065	0.039707511
hsa-miR-28-3p	-1.03093328	12.35438644	2.78E-08	7.65E-08
hsa-miR-939-5p	-1.03325253	1.107848956	0.005783629	0.009298908
hsa-miR-3130-5p	-1.054356628	3.022221882	0.010906207	0.016584059
hsa-miR-589-3p	-1.054738013	1.765811474	0.008062198	0.012587084
hsa-miR-34c-3p	-1.06405373	0.997635208	0.021786057	0.03097774
hsa-let-7a-5p	-1.070467202	14.3579864	5.77E-05	0.000118334
hsa-miR-616-3p	-1.083150381	1.031486746	0.024481508	0.033983241
hsa-miR-664a-3p	-1.092065007	3.98893927	8.53E-05	0.000171759
hsa-miR-151b	-1.13481339	0.710432801	0.01137131	0.017142556
hsa-miR-130b-5p	-1.152412788	4.392192998	2.77E-05	5.90E-05
hsa-miR-769-3p	-1.164035829	0.992860548	0.00434024	0.007108664
hsa-miR-181b-5p	-1.165076025	7.597513657	4.44E-05	9.16E-05
hsa-miR-30b-3p	-1.166636483	1.719998548	0.000557763	0.00100512
hsa-miR-409-3p	-1.173324182	4.526912238	2.17E-07	5.50E-07
hsa-miR-940	-1.174964163	2.030193662	0.001913737	0.00325614
hsa-miR-425-3p	-1.190465673	3.504759263	1.15E-07	2.98E-07
hsa-miR-639	-1.194123059	0.500002277	0.035312549	0.047330969
hsa-miR-543	-1.19847323	0.544622473	0.005886392	0.009442472
hsa-miR-1301-3p	-1.202287268	2.633599853	2.89E-05	6.11E-05
hsa-miR-501-5p	-1.229623372	2.138406724	0.000370452	0.000678033
hsa-miR-18a-3p	-1.236833052	1.92059317	0.00058576	0.001052865
hsa-miR-106b-3p	-1.250229722	8.304218771	6.82E-08	1.82E-07
hsa-miR-4449	-1.270328941	1.357335758	0.016624751	0.024128262
hsa-miR-200b-5p	-1.271127075	6.524128228	3.26E-08	8.93E-08
hsa-miR-338-5p	-1.322674812	2.796476048	0.00040711	0.000743058
hsa-miR-505-3p	-1.343787868	5.611592433	1.60E-13	6.81E-13
hsa-miR-320a-3p	-1.361046255	8.872532274	1.05E-05	2.37E-05
hsa-miR-664b-3p	-1.378397924	1.656425196	2.59E-05	5.57E-05
hsa-miR-3651	-1.379337039	1.737603463	0.003704121	0.006138509
hsa-miR-4638-3p	-1.383856626	0.477017835	0.008367395	0.012976867
hsa-miR-6783-3p	-1.405097526	0.004629721	0.023223448	0.032559274
hsa-miR-125b-1-3p	-1.417552536	0.563241516	0.007976387	0.012480909
hsa-miR-1271-5p	-1.436509152	1.625223873	0.000218498	0.000415088
hsa-miR-3934-5p	-1.463684843	0.925272888	0.000698409	0.001242601
hsa-miR-342-3p	-1.468766846	6.264865914	1.55E-07	3.98E-07
hsa-miR-214-3p	-1.470843776	3.046140579	0.000246058	0.000463674
hsa-miR-500b-3p	-1.478648001	1.232189529	0.000180161	0.000345062
hsa-miR-3609	-1.488176994	0.312104986	0.029852223	0.040555054
hsa-miR-324-5p	-1.519052837	4.206493487	1.10E-10	3.64E-10
hsa-miR-891a-5p	-1.531192204	1.173218837	0.009428497	0.014558097
hsa-miR-323a-3p	-1.53587187	2.142226148	8.26E-07	2.00E-06
hsa-miR-185-3p	-1.558524801	2.339985532	1.15E-06	2.76E-06
hsa-miR-874-5p	-1.558818165	0.236444799	0.003206489	0.005364556
hsa-miR-4780	-1.560179044	-0.102597582	0.034563094	0.04641519
hsa-miR-296-3p	-1.560497699	0.734566231	0.008307477	0.012912509
hsa-miR-877-5p	-1.562778047	1.487294852	0.000126811	0.000247617
hsa-miR-505-5p	-1.574340372	2.986939858	6.77E-11	2.30E-10
hsa-miR-330-3p	-1.579816036	1.971444346	1.41E-06	3.35E-06
hsa-miR-127-3p	-1.582524559	9.331613218	2.04E-08	5.71E-08
hsa-miR-1292-5p	-1.596341023	0.304148291	0.000448034	0.000811555
hsa-miR-6852-5p	-1.597056166	-0.125433166	0.008211692	0.012791992
hsa-miR-4446-3p	-1.609297251	-0.038243611	0.017745438	0.025490885
hsa-miR-4453	-1.613031501	-0.061878243	0.024284678	0.033776903
hsa-miR-383-5p	-1.614494894	0.62397851	0.020482897	0.029243402
hsa-miR-128-1-5p	-1.628794512	2.994271563	6.99E-12	2.57E-11
hsa-miR-331-3p	-1.62915134	4.478543323	1.47E-10	4.80E-10
hsa-miR-491-5p	-1.629726609	1.140951337	3.86E-06	8.90E-06
hsa-miR-200c-3p	-1.635729185	13.65907352	6.43E-11	2.20E-10
hsa-miR-501-3p	-1.642408789	5.832146613	7.58E-10	2.34E-09
hsa-miR-1266-5p	-1.649296409	4.156451028	3.54E-06	8.22E-06
hsa-miR-4326	-1.657358955	2.899610421	0.000101716	0.000200854
hsa-miR-3158-3p	-1.713114361	-0.127425697	0.005148169	0.008353858
hsa-miR-423-5p	-1.720855638	5.627764101	7.47E-10	2.33E-09
hsa-miR-125b-2-3p	-1.727751938	2.478987152	0.000100334	0.000198683
hsa-miR-485-5p	-1.73611436	-0.076002268	0.001841679	0.003148821
hsa-miR-5091	-1.740374698	0.49854354	0.000267202	0.00049949
hsa-miR-431-3p	-1.741029483	3.162481015	2.12E-09	6.43E-09
hsa-miR-652-3p	-1.776248451	4.93353606	1.25E-16	6.79E-16
hsa-miR-140-3p	-1.8085277	9.451221358	3.30E-14	1.52E-13
hsa-miR-133b	-1.817917104	2.753502818	0.001742536	0.002986595
hsa-miR-132-3p	-1.826337682	6.511958866	6.16E-13	2.50E-12
hsa-miR-4660	-1.83551576	-0.051263993	0.001529211	0.002640337
hsa-miR-1247-5p	-1.845706645	5.662116533	8.80E-05	0.000176198
hsa-miR-4746-5p	-1.846508988	2.083415227	1.78E-07	4.55E-07
hsa-miR-503-3p	-1.87545399	1.036851446	9.37E-05	0.000186678
hsa-let-7i-3p	-1.901764205	5.995464165	5.31E-15	2.60E-14
hsa-miR-92a-3p	-1.903580711	14.36925819	2.38E-14	1.11E-13
hsa-miR-3199	-1.925397209	0.169383055	2.13E-05	4.63E-05
hsa-miR-125a-3p	-1.926294232	1.778156556	4.05E-07	1.01E-06
hsa-miR-339-5p	-1.951877372	5.181086458	1.87E-11	6.72E-11
hsa-miR-5001-5p	-1.970123133	0.213653151	6.65E-05	0.000134337
hsa-miR-191-3p	-1.970696183	2.816077259	1.25E-09	3.83E-09
hsa-miR-1270	-1.982650538	0.268897907	0.000122071	0.000239697
hsa-miR-3074-5p	-1.988658539	3.003059406	2.31E-12	8.92E-12
hsa-miR-377-5p	-1.99522857	1.283647452	1.03E-07	2.69E-07
hsa-miR-654-5p	-2.00601917	1.169768078	1.20E-08	3.48E-08
hsa-miR-6509-5p	-2.027158657	0.26325437	2.51E-05	5.43E-05
hsa-miR-219a-1-3p	-2.035194167	1.865698341	1.48E-10	4.82E-10
hsa-miR-29b-2-5p	-2.088915428	3.94442287	6.83E-22	5.44E-21
hsa-miR-3614-5p	-2.107587946	2.041361818	2.09E-08	5.85E-08
hsa-miR-370-3p	-2.15482996	2.719014124	1.21E-16	6.64E-16
hsa-miR-589-5p	-2.162578647	5.818696956	4.29E-41	9.12E-40
hsa-miR-6820-3p	-2.16441652	-0.051581363	0.000175461	0.000336981
hsa-miR-6715b-3p	-2.17659683	1.097549099	1.74E-05	3.83E-05
hsa-miR-320c	-2.177931082	0.583007987	7.03E-08	1.87E-07
hsa-miR-432-5p	-2.188904114	2.813609516	4.57E-13	1.86E-12
hsa-miR-1468-5p	-2.200957896	2.584720301	2.08E-13	8.69E-13
hsa-miR-937-3p	-2.202445385	1.907034229	8.41E-09	2.45E-08
hsa-miR-1229-3p	-2.219905756	0.262922426	1.12E-05	2.50E-05
hsa-miR-99b-3p	-2.239260992	5.076674184	2.24E-19	1.43E-18
hsa-miR-6842-3p	-2.245826026	1.871743772	1.96E-12	7.65E-12
hsa-miR-4521	-2.265758198	-0.062940719	8.27E-06	1.88E-05
hsa-let-7c-5p	-2.266677368	9.112961803	2.13E-10	6.84E-10
hsa-miR-6798-3p	-2.312898507	-0.083971727	4.14E-05	8.57E-05
hsa-let-7b-3p	-2.316515958	4.56103064	9.12E-35	1.52E-33
hsa-miR-629-3p	-2.331852916	3.279238344	7.28E-13	2.93E-12
hsa-miR-1306-3p	-2.337005684	0.785937382	6.26E-11	2.15E-10
hsa-miR-378a-3p	-2.337474227	10.45673807	7.55E-32	1.04E-30
hsa-miR-15b-5p	-2.368582391	7.626899997	5.68E-33	8.85E-32
hsa-miR-874-3p	-2.38467308	4.421878683	1.04E-19	6.76E-19
hsa-miR-30c-2-3p	-2.384684871	3.476372424	2.23E-12	8.65E-12
hsa-let-7e-3p	-2.384743753	3.002185356	3.45E-19	2.16E-18
hsa-miR-760	-2.387741215	0.627128522	6.30E-07	1.55E-06
hsa-miR-484	-2.388597386	5.791617825	1.19E-50	3.48E-49
hsa-miR-125b-5p	-2.391655539	8.18161925	1.08E-15	5.46E-15
hsa-miR-6716-3p	-2.418924586	0.213636983	1.31E-08	3.74E-08
hsa-miR-632	-2.423583687	0.068616451	4.82E-07	1.20E-06
hsa-miR-6892-5p	-2.450849847	1.432584679	3.02E-15	1.50E-14
hsa-miR-1228-3p	-2.467008929	0.188089898	1.22E-08	3.50E-08
hsa-miR-5698	-2.492728959	0.163336349	9.91E-07	2.39E-06
hsa-miR-365b-5p	-2.507381443	-0.026681579	4.72E-07	1.18E-06
hsa-miR-3690	-2.511805	0.174684238	1.51E-07	3.90E-07
hsa-miR-23a-5p	-2.553346324	2.376743518	1.07E-13	4.64E-13
hsa-miR-23b-5p	-2.554570206	0.782367889	1.39E-12	5.55E-12
hsa-miR-361-3p	-2.638512996	6.662620911	1.05E-32	1.60E-31
hsa-miR-4787-3p	-2.650686412	-0.121958382	3.66E-06	8.46E-06
hsa-miR-193b-3p	-2.674055124	5.165883257	1.81E-32	2.58E-31
hsa-miR-2110	-2.717686902	1.196638019	4.49E-17	2.52E-16
hsa-miR-3940-5p	-2.719533437	1.028645776	2.58E-11	9.13E-11
hsa-miR-3605-3p	-2.720796824	1.785167289	1.65E-16	8.90E-16
hsa-miR-99b-5p	-2.74960585	13.94503676	2.10E-50	5.88E-49
hsa-miR-5010-3p	-2.765761268	0.469864777	1.50E-13	6.41E-13
hsa-miR-375-3p	-2.771900942	14.9845541	5.16E-19	3.17E-18
hsa-miR-1249-3p	-2.788920158	1.147685845	1.34E-18	8.12E-18
hsa-miR-3928-3p	-2.801792845	1.090990428	2.45E-17	1.39E-16
hsa-miR-218-1-3p	-2.845664071	-0.081286338	2.38E-08	6.61E-08
hsa-miR-296-5p	-2.851694932	2.15365727	1.40E-12	5.57E-12
hsa-miR-3130-3p	-2.859610388	-0.04598517	6.56E-10	2.06E-09
hsa-miR-7706	-2.860623351	1.404909325	1.23E-20	8.89E-20
hsa-miR-342-5p	-2.864402688	2.077900673	1.57E-26	1.66E-25
hsa-miR-92b-3p	-2.891312978	6.24471118	3.23E-36	5.95E-35
hsa-miR-487a-5p	-2.902321193	0.58225397	4.47E-16	2.30E-15
hsa-miR-324-3p	-2.905856803	3.995791119	1.08E-43	2.70E-42
hsa-miR-129-2-3p	-2.917908928	-0.014222835	1.04E-06	2.50E-06
hsa-miR-485-3p	-2.97143378	1.926111902	2.76E-26	2.80E-25
hsa-miR-1307-3p	-2.984225994	10.29567042	3.57E-35	6.10E-34
hsa-miR-2116-3p	-2.986864118	0.259937596	1.49E-15	7.52E-15
hsa-miR-193a-5p	-2.989597578	7.356163138	3.50E-34	5.57E-33
hsa-miR-1228-5p	-2.989947598	0.034527681	8.05E-11	2.71E-10
hsa-miR-3127-5p	-3.001298407	3.074346667	3.74E-31	5.04E-30
hsa-miR-532-3p	-3.005384747	5.742535391	7.22E-49	1.95E-47
hsa-miR-6125	-3.031238658	0.055272215	4.73E-11	1.63E-10
hsa-miR-3150b-3p	-3.034425829	2.160677028	1.80E-13	7.59E-13
hsa-miR-423-3p	-3.036760218	6.682590241	1.15E-88	6.72E-87
hsa-miR-4676-5p	-3.068216724	0.527509878	4.08E-18	2.42E-17
hsa-miR-3652	-3.083394374	-0.090032679	9.46E-11	3.16E-10
hsa-miR-3944-3p	-3.119922189	-0.107516652	3.12E-11	1.09E-10
hsa-miR-365a-5p	-3.122175036	0.090934989	6.27E-14	2.84E-13
hsa-let-7b-5p	-3.135068453	13.4304818	2.51E-85	1.35E-83
hsa-miR-146b-3p	-3.137201675	6.137329978	2.24E-37	4.37E-36
hsa-miR-3917	-3.169764899	1.293714344	1.52E-23	1.35E-22
hsa-miR-744-5p	-3.183834685	4.391609357	2.13E-63	8.30E-62
hsa-miR-326	-3.201586774	2.423276344	1.06E-30	1.40E-29
hsa-miR-1296-5p	-3.229684875	2.631577136	1.32E-41	3.08E-40
hsa-miR-615-3p	-3.244071147	1.347460143	1.23E-08	3.51E-08
hsa-miR-181a-5p	-3.276856896	9.762458046	4.17E-62	1.54E-60
hsa-miR-486-3p	-3.287921025	0.287543942	5.11E-14	2.32E-13
hsa-miR-433-3p	-3.295384564	1.051750253	3.15E-26	3.15E-25
hsa-miR-3615	-3.309674689	2.439923432	9.46E-38	1.89E-36
hsa-miR-5187-5p	-3.311133415	-0.039470226	7.59E-16	3.89E-15
hsa-miR-574-3p	-3.324796792	6.109896987	1.20E-60	4.19E-59
hsa-miR-6808-3p	-3.354537444	-0.063514438	6.29E-15	3.02E-14
hsa-miR-4728-3p	-3.377310042	0.947090278	1.79E-15	8.99E-15
hsa-miR-145-5p	-3.426187866	11.64629321	1.94E-39	3.99E-38
hsa-miR-150-3p	-3.434284054	1.591272901	2.29E-21	1.75E-20
hsa-miR-1226-3p	-3.466505791	0.956906767	4.97E-26	4.91E-25
hsa-miR-1180-3p	-3.474205202	3.796327774	1.10E-36	2.09E-35
hsa-miR-193b-5p	-3.488034071	1.934153167	3.91E-41	8.57E-40
hsa-miR-195-3p	-3.493064653	1.449486808	6.60E-32	9.25E-31
hsa-miR-133a-3p	-3.493415758	5.040245306	5.16E-20	3.51E-19
hsa-miR-210-5p	-3.519716581	0.442009192	4.07E-21	3.06E-20
hsa-miR-1343-3p	-3.531814136	0.283632271	4.14E-21	3.08E-20
hsa-miR-150-5p	-3.547721764	9.068136812	1.60E-41	3.61E-40
hsa-miR-605-5p	-3.580540215	0.303540064	1.34E-22	1.11E-21
hsa-miR-490-3p	-3.585125702	2.566555122	4.98E-08	1.33E-07
hsa-miR-378a-5p	-3.637291877	7.237194129	1.17E-90	8.23E-89
hsa-miR-3173-5p	-3.685210603	0.332452204	2.59E-27	2.93E-26
hsa-miR-6720-3p	-3.709578364	0.264773739	1.67E-21	1.28E-20
hsa-miR-671-3p	-3.780180779	1.914627092	4.68E-73	2.05E-71
hsa-miR-149-5p	-3.811525008	4.02937291	1.72E-51	5.48E-50
hsa-miR-187-3p	-3.840949016	1.447251347	3.06E-13	1.27E-12
hsa-miR-3127-3p	-3.880358172	-0.048741335	4.05E-20	2.79E-19
hsa-let-7d-3p	-3.885146766	8.908929058	1.25E-167	2.92E-165
hsa-miR-1976	-3.904200707	3.418894345	1.14E-88	6.72E-87
hsa-miR-125a-5p	-3.918144866	8.299386261	4.14E-111	4.84E-109
hsa-miR-194-3p	-3.969631817	8.251317068	1.24E-96	9.65E-95
hsa-miR-7702	-3.974978652	0.975924808	1.10E-21	8.69E-21
hsa-miR-1306-5p	-4.021143561	3.009128207	3.06E-108	3.06E-106
hsa-miR-1224-5p	-4.025566184	1.627405917	2.62E-11	9.22E-11
hsa-miR-766-3p	-4.095887445	3.084940851	9.55E-112	1.34E-109
hsa-miR-642a-5p	-4.208534027	2.494920132	3.81E-43	9.21E-42
hsa-miR-3940-3p	-4.241822522	0.265811034	6.96E-36	1.25E-34
hsa-miR-129-5p	-4.415650925	2.544296477	1.24E-30	1.61E-29
hsa-miR-197-3p	-4.548594241	8.45876898	0	0
hsa-miR-139-5p	-4.762140735	5.154271425	2.52E-131	4.41E-129
hsa-miR-490-5p	-4.78251363	0.242318774	3.39E-15	1.67E-14
hsa-miR-6511b-3p	-4.809476885	1.352160552	1.02E-83	5.11E-82
hsa-miR-139-3p	-5.067571589	3.488068603	2.24E-66	9.23E-65
hsa-miR-328-3p	-5.130709236	4.624345129	2.74E-247	9.62E-245
hsa-miR-486-5p	-5.354840759	7.044983126	1.14E-106	9.98E-105
hsa-miR-504-5p	-5.741716005	0.596777854	8.07E-79	3.77E-77
